# Supplementary material for: The impact of isolated obesity compared with obesity and other risk factors on risk of stillbirth: a retrospective cohort study
Source: PubMed Central journal article supplement — CMAJ. 2024 Mar 4;196(8):E250–9. doi: 10.1503/cmaj.221450 (PMC10911866; doi:10.1503/cmaj.221450), 2024-03-04
Supplement: 221450-res-1-at.pdf [file 221450-res-1-at.pdf]

## Supplemental Figures and Tables

**Supplemental Figure 1.** Causal pathways between obesity and stillbirth, with direct and indirect effects of potential mediators and confounders

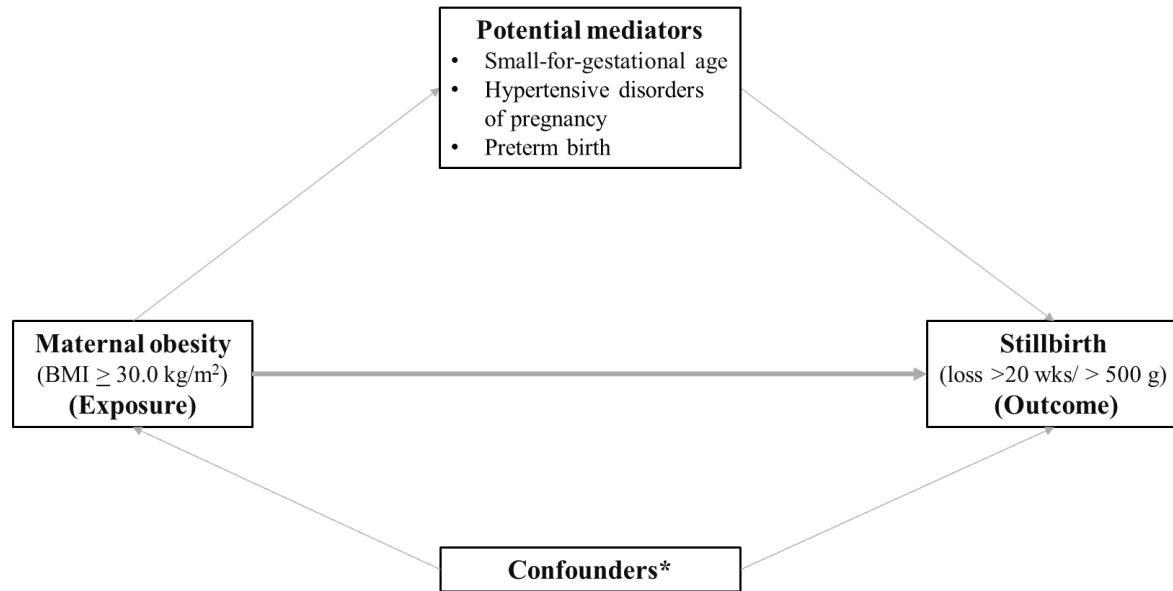

\*Fully-adjusted model confounders: maternal age >35, nulliparity, smoking, low-income quintile, substance use, artificial reproductive technologies, chronic hypertension, pre-gestational diabetes, other pre-existing health conditions, previous stillbirth, previous Cesarean section, antenatal care, small for gestational age <10th centile, gestational diabetes, hypertensive disorders of pregnancy, placental abruption, congenital fetal anomalies. Partially-adjusted model confounders: maternal age >35, nulliparity, low-income quintile, artificial reproductive technologies, other pre-existing health conditions (not including chronic hypertension and pre-gestational diabetes), previous Cesarean section, antenatal care (representing population with additional/unknown HRFC). BMI: body mass index.

**Supplemental Figure 2.** Odds Ratios and 95% Confidence Intervals for Stillbirth by gestational age for select major pre-existing maternal risk factors, among singleton hospital births in Ontario, Canada, 2012-2018 (N = 681,178) (alternate depiction of Figure 4)

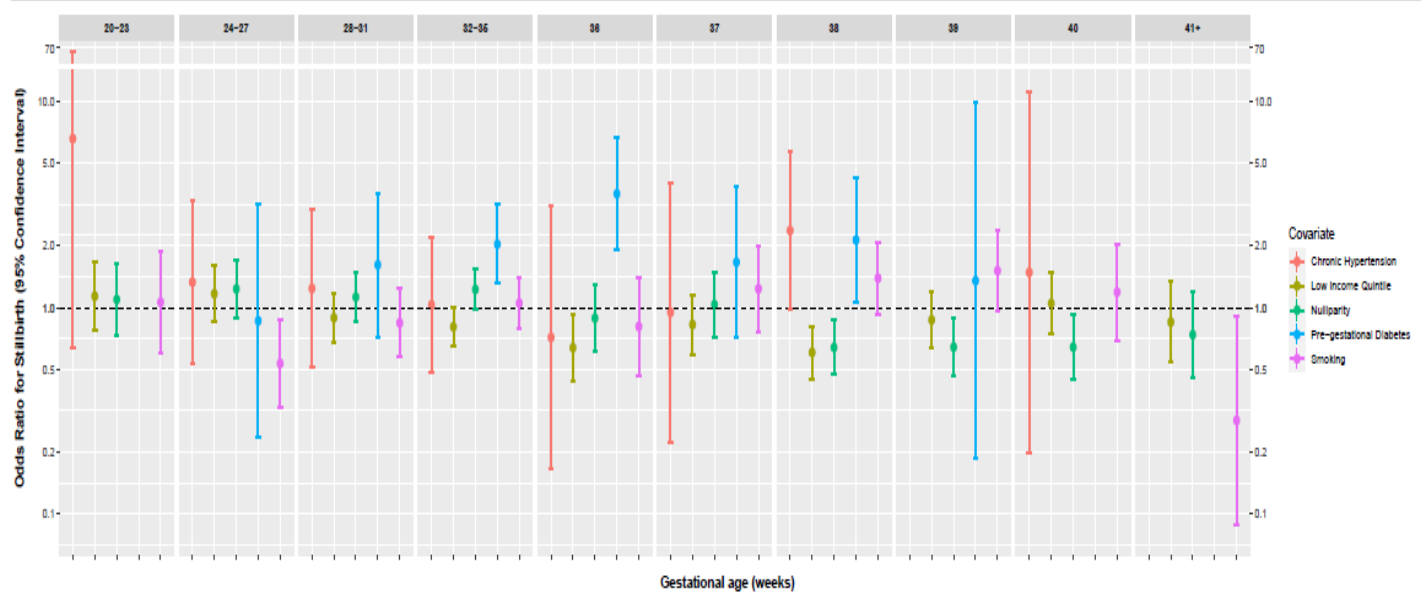

Data source: BIS data 2012/13-2017/18, restricted to births  $\geq 500$  g or 20+ completed weeks gestation; excluding intentional terminations. Note the change in gestational age interval between 32-35 and  $\geq 36$  weeks. This is based on the logistic regression model.

**Supplemental Figure 3.** Kaplan Meier curve of surviving fetuses following stillbirth by gestational age, stratified by obesity class

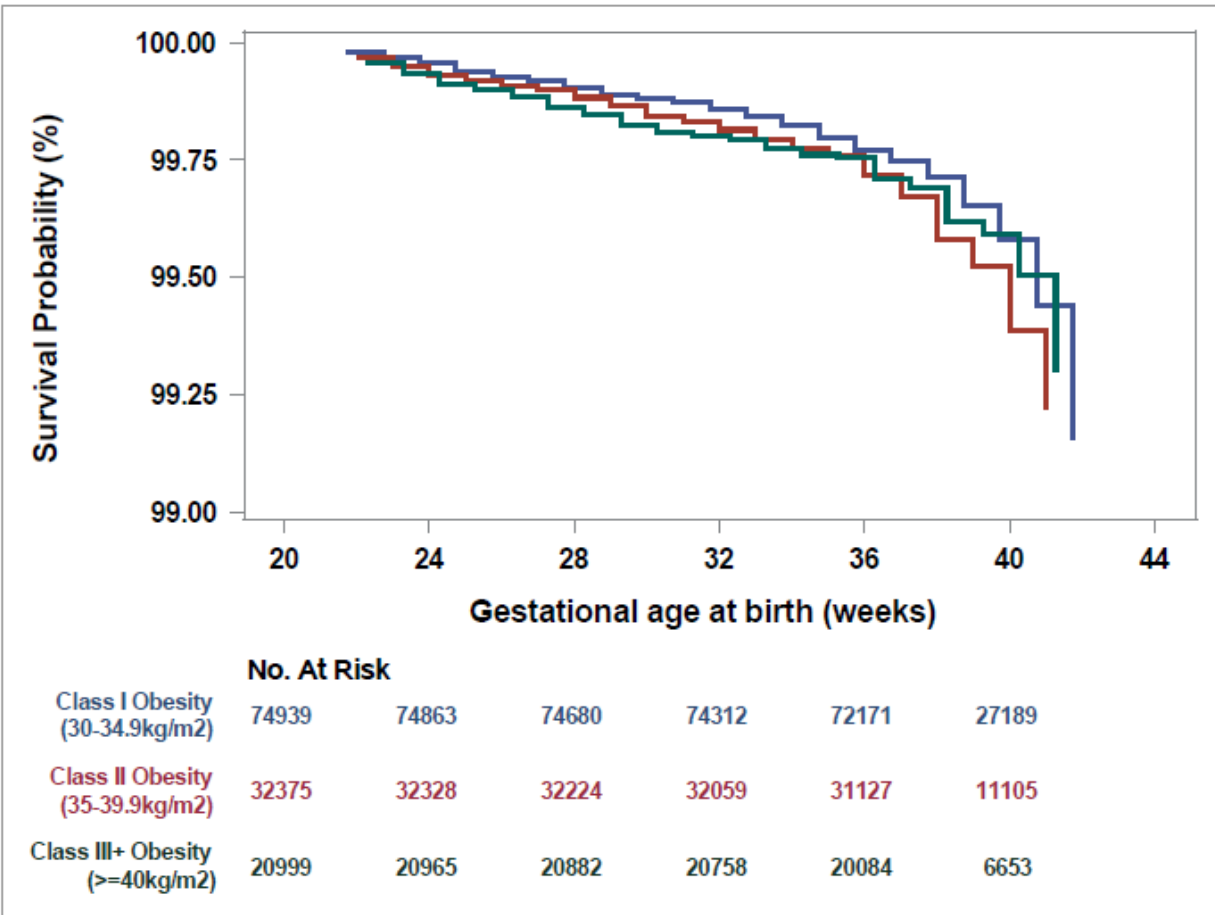

Data source: BIS data 2012/13-2017/18, restricted to births  $\geq 500$  g or 20+ completed weeks gestation; excluding intentional terminations

**Supplemental Table 1a.** Comparison of maternal baseline characteristics for the study cohort and the cohort with missing values among Singleton Hospital Births in Ontario, Canada, 2012-2018

| Variable                                         | Study cohort |        | Cohort with missing values |        | Standardized difference |
|--------------------------------------------------|--------------|--------|----------------------------|--------|-------------------------|
|                                                  | n=681,178    |        | n=904,176                  |        |                         |
|                                                  | N (Mean)     | % (SD) | N (Mean)                   | % (SD) |                         |
| <b><i>BMI, Mean (SD)</i></b>                     | (25.5)       | (6.2)  | (25.4)                     | (6.1)  | 0.02                    |
| Underweight (<18.5kg/m <sup>2</sup> ),           | (17.4)       | (1.0)  | (17.4)                     | (1.0)  | 0.00                    |
| Normal Weight (18.5-24.9kg/m <sup>2</sup> )      | (21.9)       | (1.8)  | (21.9)                     | (1.8)  | 0.00                    |
| Overweight (25.0-29.9kg/m <sup>2</sup> )         | (27.2)       | (1.4)  | (27.2)                     | (1.4)  | 0.00                    |
| Class I Obesity (30-34.9kg/m <sup>2</sup> )      | (32.1)       | (1.4)  | (32.1)                     | (1.4)  | 0.00                    |
| Class II Obesity (35-39.9kg/m <sup>2</sup> )     | (37.1)       | (1.4)  | (37.1)                     | (1.4)  | 0.00                    |
| Class III+ Obesity (>=40kg/m <sup>2</sup> )      | (45.3)       | (5.4)  | (45.3)                     | (5.4)  | 0.00                    |
| <b><i>Maternal age, Mean (SD)</i></b>            | (30.4)       | (5.3)  | (30.6)                     | (5.3)  | 0.04                    |
| <b><i>Parity</i></b>                             |              |        |                            |        |                         |
| Nulliparous                                      | 294,429      | 43.2   | 386,430                    | 42.7   | 0.01                    |
| Multiparous                                      | 386,749      | 56.8   | 507,567                    | 56.1   | 0.01                    |
| Missing                                          | -            | -      | 10,179                     | 1.1    | -                       |
| <b><i>Smoker</i></b>                             |              |        |                            |        |                         |
| Yes                                              | 69,983       | 10.3   | 87,868                     | 9.7    | 0.02                    |
| No                                               | 611,195      | 89.7   | 784,433                    | 86.8   | 0.09                    |
| Missing                                          | -            | -      | 31,875                     | 3.5    | -                       |
| <b><i>Income (quintiles)</i></b>                 |              |        |                            |        |                         |
| 1st (low)                                        | 122,004      | 17.9   | 197,257                    | 21.8   | 0.10                    |
| 2nd                                              | 138,184      | 20.3   | 154,274                    | 17.1   | 0.08                    |
| 3rd                                              | 152,230      | 22.3   | 162,793                    | 18.0   | 0.11                    |
| 4th                                              | 159,762      | 23.5   | 196,384                    | 21.7   | 0.04                    |
| 5th (high)                                       | 108,998      | 16.0   | 138,402                    | 15.3   | 0.02                    |
| Missing                                          | -            | -      | 55,066                     | 6.1    | -                       |
| <b><i>Substance exposure</i></b>                 |              |        |                            |        |                         |
| Yes                                              | 15,141       | 2.2    | 19,958                     | 2.2    | 0.00                    |
| No                                               | 666,037      | 97.8   | 837,167                    | 92.6   | 0.24                    |
| Missing                                          | -            | -      | 47,051                     | 5.2    | -                       |
| <b><i>Obstetrical history</i></b>                |              |        |                            |        |                         |
| Stillbirths                                      | 7,968        | 1.2    | 10,853                     | 1.2    | 0.00                    |
| <b><i>Health conditions during pregnancy</i></b> |              |        |                            |        |                         |
| Hypertensive disorders                           | 34,658       | 5.1    | 43,682                     | 4.8    | 0.01                    |
| Gestational diabetes                             | 48,718       | 7.2    | 64,457                     | 7.1    | 0.00                    |

|                              |         |      |         |      |      |
|------------------------------|---------|------|---------|------|------|
| <b><i>Antenatal care</i></b> |         |      |         |      |      |
| Family physician             | 69,070  | 10.1 | 95,412  | 10.6 | 0.01 |
| Obstetrician                 | 381,066 | 55.9 | 513,085 | 56.7 | 0.02 |
| Family phys. + obs.          | 107,026 | 15.7 | 121,033 | 13.4 | 0.07 |
| Midwife                      | 110,113 | 16.2 | 120,115 | 13.3 | 0.08 |
| None                         | 1,981   | 0.29 | 3,915   | 0.43 | 0.02 |
| Other                        | 11,922  | 1.8  | 16,130  | 1.8  | 0.00 |
| Missing                      | -       | -    | 34,486  | 3.8  | -    |
| <b><i>Birth outcome</i></b>  |         |      |         |      |      |
| SGA (<3rd percentile)        | 18,774  | 2.8  | 25,830  | 2.9  | 0.01 |
| SGA (<10th percentile)       | 64,618  | 9.5  | 88,034  | 9.7  | 0.01 |

Data source: BIS data 2012/13-2017/18, restricted to births  $\geq 500$  g or 20+ completed weeks gestation; excluding intentional terminations. SD: standard deviation, SGA: small for gestational age.

Standardized difference  $>0.10$  suggests an imbalance between the cohorts.

**Supplemental Table 1b.** Number and percentage of missing demographic characteristic values, stratified by fiscal year among Singleton Hospital Births in Ontario, Canada, 2012-2018 (N = 904,176)

| Variable                | Fiscal Year* |      |             |      |             |      |             |      |             |      |             |     |             |     |         |     |
|-------------------------|--------------|------|-------------|------|-------------|------|-------------|------|-------------|------|-------------|-----|-------------|-----|---------|-----|
|                         | Total        |      | FY 12/13    |      | FY 13/14    |      | FY 14/15    |      | FY 15/16    |      | FY 16/17    |     | FY 17/18**  |     | Missing |     |
|                         | n=904,176    |      | n = 135,189 |      | n = 133,220 |      | n = 133,281 |      | n = 133,445 |      | n = 134,053 |     | n = 234,950 |     | n=38    |     |
|                         | n            | %    | n           | %    | n           | %    | n           | %    | n           | %    | n           | %   | n           | %   | n       | %   |
| BMI                     | 105,270      | 11.6 | 26,112      | 19.3 | 18,807      | 14.1 | 16,695      | 12.5 | 13,451      | 10.1 | 9,606       | 7.2 | 20,599      | 8.8 | <6      | (S) |
| Maternal age            | 591          | 0.1  | <6          | (S)  | -           | -    | <6          | (S)  | <6          | (S)  | 140         | 0.1 | 451         | 0.2 | 0       | -   |
| Nulliparity             | 10,179       | 1.1  | 2,923       | 2.2  | 1,670       | 1.3  | 2,392       | 1.8  | 988         | 0.7  | 901         | 0.7 | 1,305       | 0.6 | 0       | -   |
| Smoking                 | 31,872       | 3.5  | 2,062       | 1.5  | 3,246       | 2.4  | 10,346      | 7.8  | 7,387       | 5.5  | 4,611       | 3.4 | 4,220       | 1.8 | <6      | (S) |
| Income                  | 55,061       | 6.1  | 5,270       | 3.9  | 5,900       | 4.4  | 6,378       | 4.8  | 7,655       | 5.7  | 9,269       | 6.9 | 20,589      | 8.8 | <6      | (S) |
| Substance use           | 47,048       | 5.2  | 12,652      | 9.4  | 7,712       | 5.8  | 7,055       | 5.3  | 7,555       | 5.7  | 5,394       | 4.0 | 6,680       | 2.8 | <6      | (S) |
| Antenatal care provider | 34,483       | 3.8  | 1,391       | 1.0  | 1,091       | 0.8  | 5,667       | 4.3  | 6,888       | 5.2  | 6,897       | 5.1 | 12,549      | 5.3 | <6      | (S) |

Data source: BIS data 2012/13-2017/18, restricted to births  $\geq 500$  g or 20+ completed weeks gestation; excluding intentional terminations. BMI: body mass index.

\*Fiscal year (FY) includes births from April 1, 2012 to March 31, 2018. \*\*Included births until December 31, 2018

**Supplemental Table 2.** Mediation analysis of both the partially-adjusted and fully-adjusted models for major potential mediators (total, direct and indirect effects) among singleton hospital births in Ontario, Canada, 2012-2018

|                                            | <b>SGA3</b>       | <b>SGA10</b>      | <b>Preterm birth</b> | <b>Hypertensive disorders</b> |
|--------------------------------------------|-------------------|-------------------|----------------------|-------------------------------|
| <b>Partially-Adjusted Model‡</b>           |                   |                   |                      |                               |
| <b>Overall obesity vs. Normal weight</b>   |                   |                   |                      |                               |
| Total Effects                              | 1.66 (1.42, 1.94) | 1.66 (1.42, 1.94) | 1.65 (1.42, 1.93)    | 1.66 (1.41, 1.94)             |
| Direct Effects                             | 1.77 (1.64, 1.92) | 1.86 (1.72, 2.02) | 1.48 (1.37, 1.60)    | 1.62 (1.49, 1.76)             |
| Indirect Effects                           | 0.94 (0.87, 1.01) | 0.89 (0.83, 0.96) | 1.12 (1.04, 1.20)    | 1.02 (0.95, 1.11)             |
| Proportion of the total effect mediated    | -13%              | -22%              | 21%                  | 5%                            |
| <b>Class I Obesity vs. Normal weight</b>   |                   |                   |                      |                               |
| Total Effects                              | 1.47 (1.23, 1.76) | 1.48 (1.23, 1.77) | 1.46 (1.22, 1.76)    | 1.47 (1.22, 1.77)             |
| Direct Effects                             | 1.56 (1.42, 1.72) | 1.62 (1.47, 1.79) | 1.33 (1.21, 1.48)    | 1.43 (1.30, 1.58)             |
| Indirect Effects                           | 0.94 (0.87, 1.02) | 0.91 (0.84, 0.99) | 1.09 (1.01, 1.19)    | 1.02 (0.94, 1.12)             |
| Proportion of the total effect mediated    | -15%              | -24%              | 24%                  | 6%                            |
| <b>Class II Obesity vs. Normal weight</b>  |                   |                   |                      |                               |
| Total Effects                              | 2.02 (1.64, 2.49) | 2.02 (1.64, 2.51) | 2.03 (1.65, 2.50)    | 2.02 (1.63, 2.52)             |
| Direct Effects                             | 2.15 (1.91, 2.43) | 2.28 (2.02, 2.58) | 1.80 (1.59, 2.03)    | 1.95 (1.72, 2.21)             |
| Indirect Effects                           | 0.93 (0.86, 1.02) | 0.89 (0.81, 0.97) | 1.13 (1.03, 1.23)    | 1.04 (0.94, 1.14)             |
| Proportion of the total effect mediated    | -9%               | -16%              | 16%                  | 5%                            |
| <b>Class III Obesity vs. Normal weight</b> |                   |                   |                      |                               |
| Total Effects                              | 1.77 (1.38, 2.27) | 1.81 (1.41, 2.33) | 1.73 (1.35, 2.22)    | 1.79 (1.37, 2.33)             |
| Direct Effects                             | 1.89 (1.61, 2.21) | 2.07 (1.77, 2.43) | 1.46 (1.25, 1.71)    | 1.71 (1.45, 2.01)             |
| Indirect Effects                           | 0.94 (0.86, 1.01) | 0.87 (0.80, 0.96) | 1.19 (1.08, 1.30)    | 1.05 (0.95, 1.16)             |
| Proportion of the total effect mediated    | -11%              | -22%              | 31%                  | 8%                            |
| <b>Fully-Adjusted Model†</b>               |                   |                   |                      |                               |
| <b>Overall obesity vs. Normal weight</b>   |                   |                   |                      |                               |
| Total Effects                              | 1.62 (1.39, 1.90) | 1.63 (1.39, 1.90) | 1.61 (1.38, 1.88)    | 1.61 (1.38, 1.90)             |
| Direct Effects                             | 1.74 (1.60, 1.89) | 1.82 (1.68, 1.98) | 1.52 (1.41, 1.65)    | 1.60 (1.48, 1.74)             |
| Indirect Effects                           | 0.93 (0.87, 1.01) | 0.89 (0.83, 0.96) | 1.06 (0.98, 1.14)    | 1.01 (0.93, 1.09)             |

|                                            |                   |                   |                   |                   |
|--------------------------------------------|-------------------|-------------------|-------------------|-------------------|
| Proportion of the total effect mediated    | -14%              | -24%              | 12%               | 1%                |
| <b>Class I Obesity vs. Normal weight</b>   |                   |                   |                   |                   |
| Total Effects                              | 1.45 (1.20, 1.74) | 1.45 (1.21, 1.74) | 1.44 (1.20, 1.72) | 1.44 (1.20, 1.74) |
| Direct Effects                             | 1.54 (1.39, 1.70) | 1.60 (1.44, 1.77) | 1.37 (1.24, 1.52) | 1.43 (1.29, 1.58) |
| Indirect Effects                           | 0.94 (0.86, 1.02) | 0.91 (0.84, 0.99) | 1.05 (0.96, 1.14) | 1.01 (0.93, 1.10) |
| Proportion of the total effect mediated    | -17%              | -26%              | 12%               | 3%                |
| <b>Class II Obesity vs. Normal weight</b>  |                   |                   |                   |                   |
| Total Effects                              | 1.96 (1.58, 2.42) | 1.97 (1.59, 2.44) | 1.95 (1.58, 2.40) | 1.96 (1.57, 2.44) |
| Direct Effects                             | 2.09 (1.85, 2.37) | 2.21 (1.95, 2.51) | 1.86 (1.64, 2.10) | 1.92 (1.69, 2.18) |
| Indirect Effects                           | 0.93 (0.86, 1.02) | 0.89 (0.81, 0.97) | 1.05 (0.96, 1.14) | 1.02 (0.93, 1.12) |
| Proportion of the total effect mediated    | -10%              | -17%              | 7%                | 3%                |
| <b>Class III Obesity vs. Normal weight</b> |                   |                   |                   |                   |
| Total Effects                              | 1.73 (1.33, 2.23) | 1.77 (1.36, 2.30) | 1.66 (1.28, 2.14) | 1.70 (1.30, 2.22) |
| Direct Effects                             | 1.85 (1.57, 2.19) | 2.03 (1.71, 2.41) | 1.56 (1.32, 1.84) | 1.66 (1.40, 1.97) |
| Indirect Effects                           | 0.93 (0.85, 1.02) | 0.87 (0.80, 0.96) | 1.06 (0.97, 1.16) | 1.02 (0.93, 1.13) |
| Proportion of the total effect mediated    | -13%              | -24%              | 12%               | 4%                |

Data source: BIS data 2012/13-2017/18, restricted to births  $\geq 500$  g or 20+ completed weeks gestation; excluding intentional terminations. SGA3: small for gestation < 3<sup>rd</sup> centile; SGA10 = small for gestation < 10<sup>th</sup> centile.

Mediation analyses were carried out based on methods proposed by Lange T, Vansteelandt S, Bekaert M. A simple unified approach for estimating natural direct and indirect effects. *American Journal of Epidemiology*. 2012;176(3):190-195. R programs created by Rochon J, du Bois A, Lange T. Mediation analysis of the relationship between institutional research activity and patient survival. *BMC Med Res Methodol*. 2014;14(9). <https://doi.org/10.1186/1471-2288-14-9>.

‡Partially-adjusted for maternal age > 35, nulliparity, low-income quintile, artificial reproductive technologies, other pre-existing health conditions (not including chronic hypertension nor pre-gestational diabetes), previous Cesarean section, antenatal care.

†Fully-adjusted for maternal age > 35, nulliparity, smoking, low-income quintile, substance use, artificial reproductive technologies, chronic hypertension, pre-gestational diabetes, other pre-existing health conditions, previous stillbirth, previous Cesarean section, antenatal care, gestational diabetes, placental abruption, and congenital fetal anomalies.



**Supplemental Table 3:** Fully-Adjusted and Partially-Adjusted Hazard Ratios for Stillbirth by BMI category among Singleton Hospital Births in Ontario, Canada, 2012-2018 (N = 681,178)

| Obesity Class     | Fully-Adjusted†<br>Hazard Ratio | 95% Confidence<br>Interval | Partially-Adjusted‡<br>Hazard Ratio | 95% Confidence<br>Interval |
|-------------------|---------------------------------|----------------------------|-------------------------------------|----------------------------|
| Reference: Normal | --                              | --                         | --                                  | --                         |
| Underweight       | 0.96                            | (0.78-1.18)                | 1.06                                | (0.87-1.31)                |
| Overweight        | 1.21                            | (1.08-1.35)                | 1.15                                | (1.03-1.28)                |
| Class I Obesity   | 1.55                            | (1.35-1.78)                | 1.46                                | (1.27-1.67)                |
| Class II Obesity  | 2.17                            | (1.83-2.57)                | 2.01                                | (1.70-2.38)                |
| Class III Obesity | 1.80                            | (1.44-2.24)                | 1.74                                | (1.40-2.16)                |

Data source: BIS data 2012/13-2017/18, restricted to births  $\geq 500$  g or 20+ completed weeks gestation; excluding intentional terminations. This is based on the Cox regression model.

†Fully-adjusted model is adjusted for maternal age > 35, nulliparity, smoking, low income quintile, substance use, artificial reproductive technologies, chronic hypertension, pre-gestational diabetes, other pre-existing health conditions, previous stillbirth, previous Cesarean section, antenatal care, small for gestational age <10th centile, gestational diabetes, hypertensive disorders of pregnancy, placental abruption, congenital fetal anomalies.

‡Partially-adjusted model is adjusted for maternal age > 35, nulliparity, low income quintile, artificial reproductive technologies, other pre-existing health conditions (not including chronic hypertension and pre-gestational diabetes), previous Cesarean section, antenatal care (representing population with additional / undiagnosed HRFC).
